# Supplementary material for: Lipid-Induced Epigenomic Changes in Human Macrophages Identify a Coronary Artery Disease-Associated Variant that Regulates PPAP2B Expression through Altered C/EBP-Beta Binding
Source: PubMed Central journal article supplement (PMC4383549; doi:10.1371/journal.pgen.1005061), 2015-04-02
Supplement: pgen.1005061.s014.pdf [file pgen.1005061.s014.pdf]

| Rank | Matrix   | Trnscription factor | DNA binding domain               | Hits | P value (-10*log10) | Motif                                                                               |
|------|----------|---------------------|----------------------------------|------|---------------------|-------------------------------------------------------------------------------------|
| 1    | MC00456  | JUND                | Leucine Zipper Family            | 1213 | 690.776             |  |
| 2    | MS00288  | TFE3                | Helix-Loop-Helix Family          | 1569 | 690.776             |  |
| 3    | MC00339  | NFE2L2              | Leucine Zipper Family            | 1318 | 690.776             |  |
| 4    | MC00319  | EGR2                | BetaBetaAlpha-zinc finger Family | 2289 | 690.776             |  |
| 5    | MA0067   | PAX2                | Homeodomain Family               | 1668 | 690.776             |  |
| 6    | MC00163  | Creb1               | Leucine Zipper Family            | 1640 | 690.776             |  |
| 7    | MC00337  | Ikbz3               | BetaBetaAlpha-zinc finger Family | 976  | 688.093             |  |
| 8    | MS00302  | CEBPG               | Leucine Zipper Family            | 522  | 687.539             |  |
| 9    | MS00223  | SP3                 | BetaBetaAlpha-zinc finger Family | 2377 | 671.922             |  |
| 10   | denovo16 | EGR1                | BetaBetaAlpha-zinc finger Family | 2970 | 631.408             |  |
