# Supplementary material for: Lipid-Induced Epigenomic Changes in Human Macrophages Identify a Coronary Artery Disease-Associated Variant that Regulates PPAP2B Expression through Altered C/EBP-Beta Binding
Source: PubMed Central journal article supplement (PMC4383549; doi:10.1371/journal.pgen.1005061), 2015-04-02
Supplement: pgen.1005061.s023.pdf [file pgen.1005061.s023.pdf]

| Rank                 | P Value   | Matrix ID | Matrix Name        |
|----------------------|-----------|-----------|--------------------|
| Alternative A allele |           |           |                    |
| 1                    | <0.000625 | M00493    | V\$STAT5A_03       |
| 2                    | <0.000625 | M00921    | V\$GR_Q6_01        |
| 3                    | <0.000625 | M00500    | V\$STAT6_02        |
| 4                    | <0.000625 | M00496    | V\$STAT1_03        |
| 5                    | <0.000625 | M00498    | V\$STAT4_01        |
| 6                    | 0.000625  | M00494    | V\$STAT6_01        |
| 7                    | 0.00853   | M00747    | V\$IRF1_Q6         |
| 8                    | 0.00932   | M01250    | V\$E2F1_01         |
| 9                    | 0.0102    | M01147    | V\$DMRT2_01        |
| 10                   | 0.0113    | M00181    | V\$E2_Q6           |
| 11                   | 0.0116    | M00928    | V\$E2_Q6_01        |
| 12                   | 0.0123    | M00107    | V\$E2_01           |
| 13                   | 0.0137    | M00190    | V\$CEBP_Q2         |
| 14                   | 0.0245    | M01123    | V\$NANOG_01        |
| 15                   | 0.0249    | M01252    | V\$E2F6_01         |
| 16                   | 0.0263    | M00116    | V\$CEBPA_01        |
| 17                   | 0.0282    | M01281    | V\$NFAT1_Q6        |
| 18                   | 0.036     | M00185    | V\$NFY_Q6          |
| 19                   | 0.0449    | M00463    | V\$POU3F2_01       |
| 20                   | 0.0452    | M00621    | V\$CEBPDELTA_Q6    |
| 21                   | 0.0471    | M00309    | V\$ACAAT_B         |
| 22                   | 0.0473    | M00750    | V\$HMGYIY_Q6       |
| 23                   | 0.0498    | M00775    | V\$NFY_Q6_01       |
| Reference G allele   |           |           |                    |
| 1                    | <0.000938 | M00493    | V\$STAT5A_03       |
| 2                    | <0.000938 | M00921    | V\$GR_Q6_01        |
| 3                    | <0.000938 | M00500    | V\$STAT6_02        |
| 4                    | <0.000938 | M00496    | V\$STAT1_03        |
| 5                    | <0.000938 | M00498    | V\$STAT4_01        |
| 6                    | 0.000938  | M00494    | V\$STAT6_01        |
| 7                    | 0.00287   | M00181    | V\$E2_Q6           |
| 8                    | 0.0053    | M00928    | V\$E2_Q6_01        |
| 9                    | 0.00563   | M00107    | V\$E2_01           |
| 10                   | 0.00852   | M00747    | V\$IRF1_Q6         |
| 11                   | 0.00931   | M01250    | V\$E2F1_01         |
| 12                   | 0.0203    | M01123    | V\$NANOG_01        |
| 13                   | 0.0249    | M01252    | V\$E2F6_01         |
| 14                   | 0.0282    | M01281    | V\$NFAT1_Q6        |
| 15                   | 0.0314    | M00792    | V\$SMAD_Q6         |
| 16                   | 0.0443    | M00070    | V\$TAL1BETAITF2_01 |
| 17                   | 0.0475    | M00750    | V\$HMGYIY_Q6       |
